# Supplementary material for: Age-related secretion of grancalcin by macrophages induces skeletal stem/progenitor cell senescence during fracture healing
Source: PubMed Central journal article supplement (PMC10808101; doi:10.1038/s41413-023-00309-1), 2024-01-25

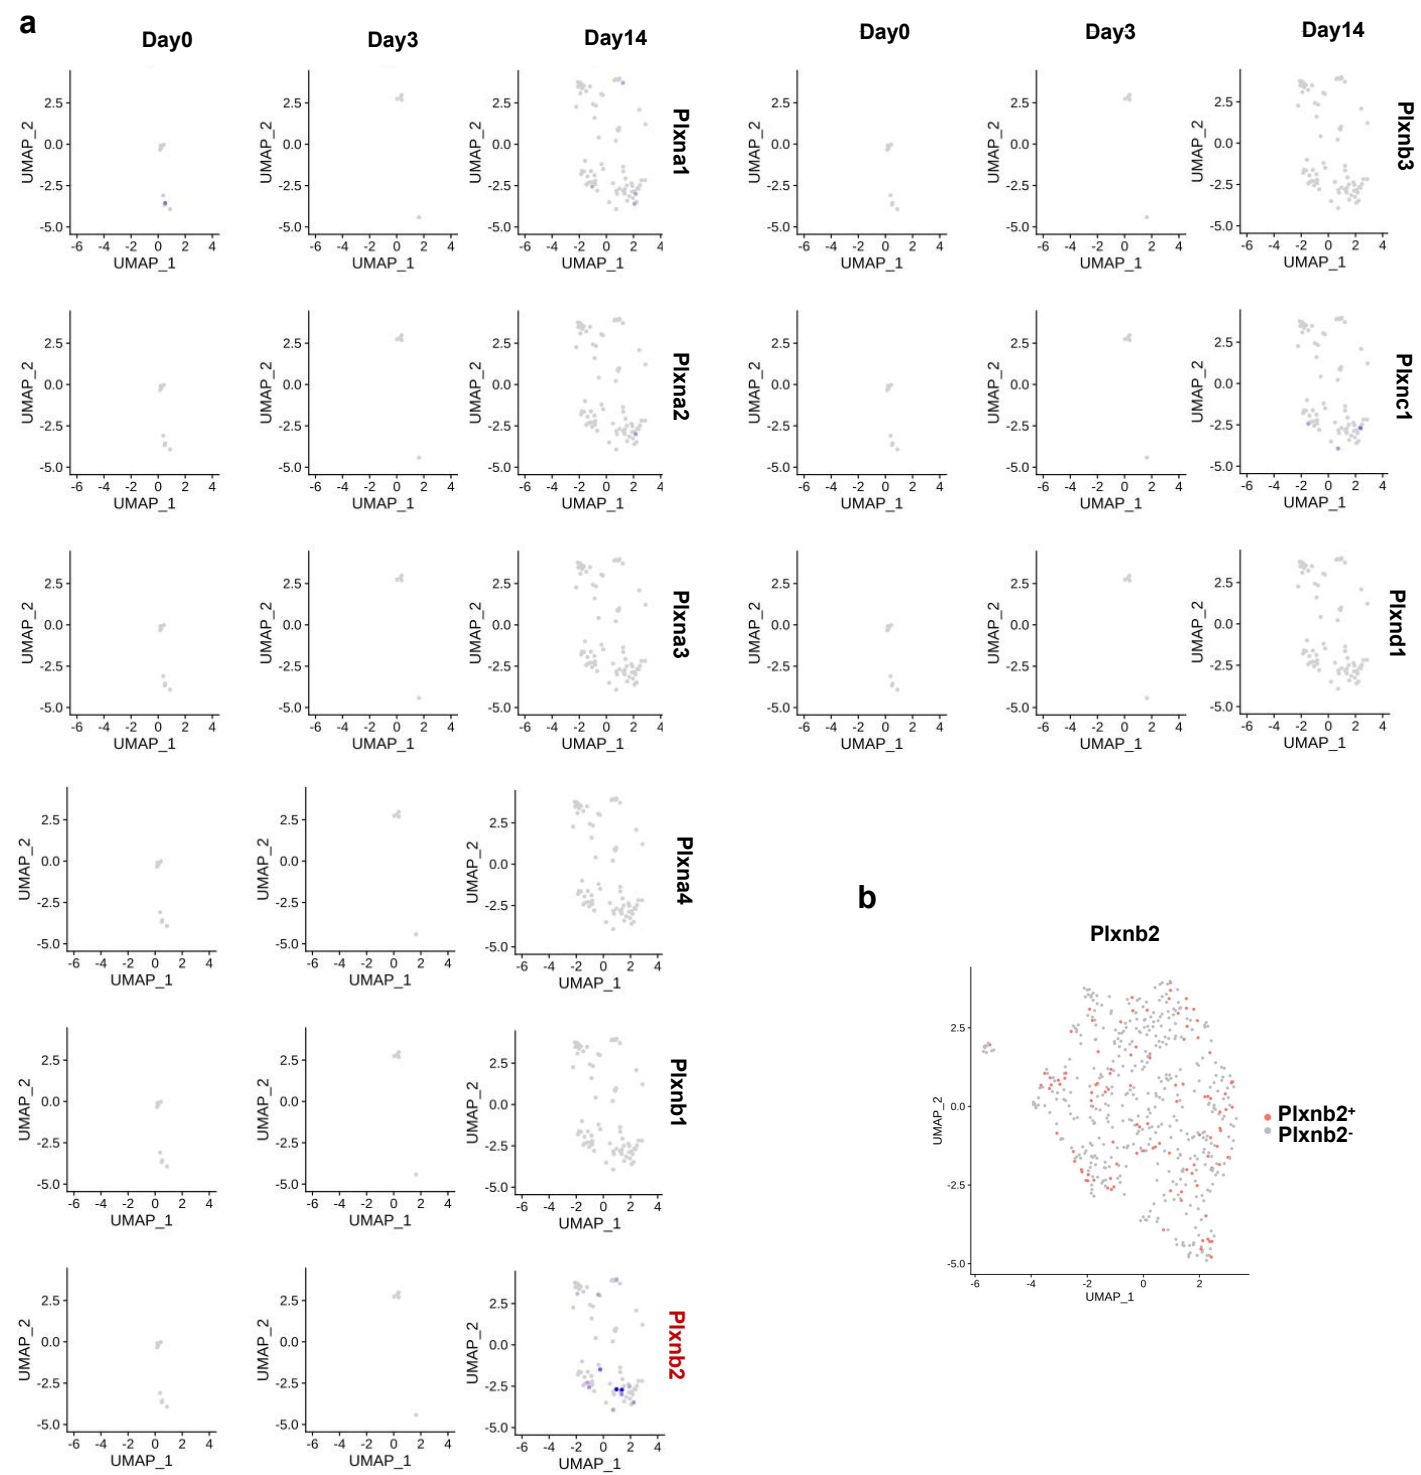

**b**

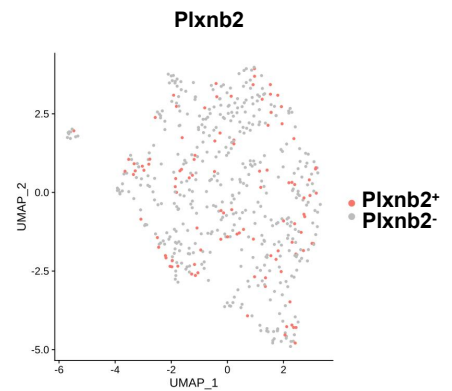

**c**

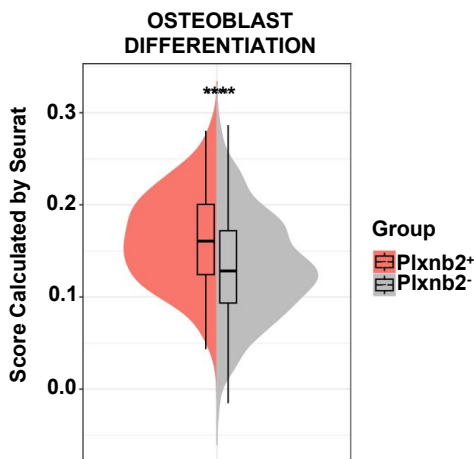

**d**

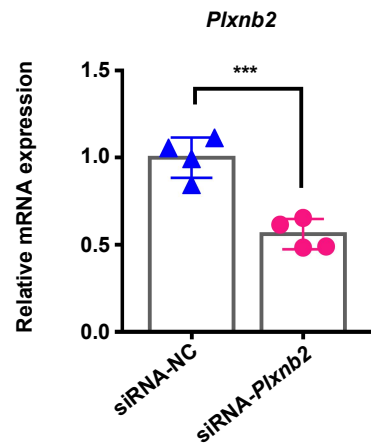

Supplement: 41413_2023_309_MOESM5_ESM.pdf [file 41413_2023_309_MOESM5_ESM.pdf]
